# Supplementary material
Source: ML conference proceedings conference paper supplement (https://proceedings.neurips.cc/paper_files/paper/2020/hash/d6d231705f96d5a35aeb3a76402e49a3-Abstract.html)

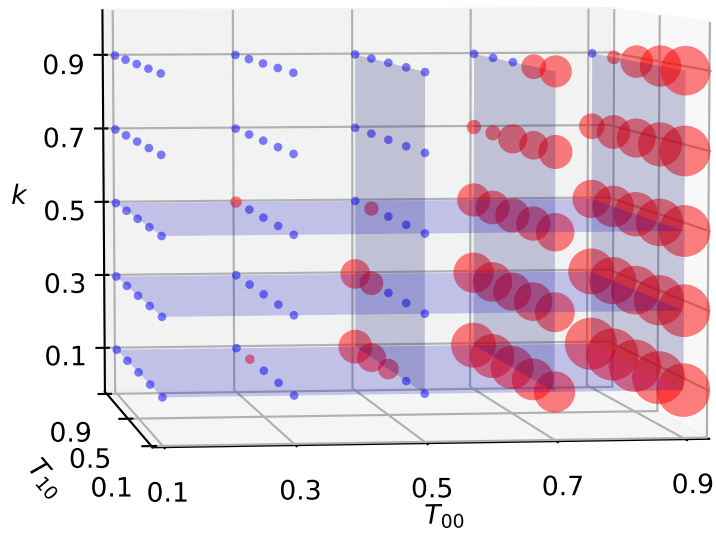

Supplement: Supplementary file [file d6d231705f96d5a35aeb3a76402e49a3-Supplemental.zip]
